Morteratsch\_Sailer et al.

1 **Dynamics of apomictic and sexual**  
2 **reproduction during primary**  
3 **succession on a glacier forefield**  
4 **in the Swiss Alps**  
5

6 Christian Sailer<sup>1,3</sup>, Jürg Stöcklin<sup>2</sup>, and Ueli Grossniklaus<sup>1\*</sup>

7

8 <sup>1</sup>Department of Plant and Microbial Biology & Zurich-Basel Plant Science Centre,  
9 University of Zurich, Zollikerstrasse 107, 8008 Zurich, Switzerland

10 <sup>2</sup>Institute of Botany & Zurich-Basel Plant Science Centre, University of Basel,  
11 Schönbeinstrasse 6, 4056 Basel, Switzerland

12 <sup>3</sup>Current address: Institute of Integrative Biology, ETH Zurich, Zurich, Switzerland

13

14 \* Author to whom correspondence should be addressed, Ueli Grossniklaus,  
15 [grossnik@botinst.uzh.ch](mailto:grossnik@botinst.uzh.ch)

16

17

## 18 **Abstract**

19 Apomixis, the asexual reproduction through seeds, is thought to provide reproductive assurance  
20 when ploidy is not even and/or when population density is low. Therefore, apomicts are  
21 expected to be more abundant, and the frequency of apomictic offspring higher, at early stages  
22 of primary succession when mates are rare.

23 To test this hypothesis, we sampled facultative apomictic *Hieracium pilosella* L. along the  
24 successional gradient on a glacier forefield and determined their ploidy, the level of apomixis  
25 in their offspring, and the genetic diversity of the entire meta-population and within  
26 subpopulations.

27 We found that apomixis is more common in odd- and aneuploid cytotypes, which are more  
28 frequent at early stages of primary succession. However, apomixis was uncommon at all  
29 successional stages and sexual hexaploids were dominating throughout. Reproductive assurance  
30 was reflected in the higher fertility of all odd-ploid apomictic plants (3x, 5x) by avoiding  
31 meiosis, illustrating that apomixis provides an escape from sterility, as proposed by Darlington.  
32 Odd-ploid plants are supposedly better colonizers (Baker's law), which is supported by their  
33 higher occurrence close to the glacier snout. Independent of succession, we found gene flow  
34 between apomicts and sexuals, which allows for the continuous creation of new apomictic and  
35 sexual genotypes.

36 We conclude that apomixis in *H. pilosella* does indeed provide an escape from sterility, and  
37 therefore reproductive assurance, in aneuploid cytotypes. We further propose that apomixis  
38 preserves beneficial combinations of unlinked alleles in every generation for as long as  
39 apomictic genotypes persist in the population.

40

Morteratsch\_Sailer et al.

## 41 **Keywords**

42 Reproductive ecology, alpine ecosystem, apomixis, flow cytometric seed screen (FCSS),  
43 *Hieracium pilosella*, Morteratsch glacier, primary succession, sexual reproduction

44

## 45 **Introduction**

46 Apomixis can be viewed as a deregulation of sexual processes, resulting in asexual  
47 reproduction through seeds<sup>1-4</sup>. It modifies processes central to sexual reproduction: Meiosis and  
48 thus segregation is avoided (apomeiosis), and because the embryo – and sometimes also the  
49 endosperm – develops without fertilization (parthenogenesis), there is no paternal genomic  
50 contribution to the offspring. As a consequence, apomictically formed seeds are clones that are  
51 genetically identical to the mother plant.

52 Because apomicts do not require a mate<sup>6</sup>, apomixis provides reproductive assurance in  
53 obligate outcrossing plant species<sup>6-9</sup>. Moreover, apomixis provides an escape from sterility when  
54 ploidy is not even, such that meiosis fails<sup>9</sup>. In such species, apomictic genotypes are predicted  
55 to be more efficient colonizers than sexual genotypes. This view is supported by the phenomenon  
56 of geographical parthenogenesis, which describes that apomictic cytotypes are geographically  
57 more widespread than sexual cytotypes<sup>10-14</sup>, and the finding that invasive alien species are often  
58 apomictic<sup>15-17</sup>.

59 Although apomicts have the advantage of reproductive assurance, they are thought to  
60 accumulate deleterious mutations<sup>18</sup>. Without meiosis, no mechanism exists to purge deleterious  
61 mutations from the genomic pool of a population. This results in a successive reduction in fitness  
62 and, eventually, genotypes that have reached a critical threshold of deleterious mutations go  
63 extinct, a process known as Muller's ratchet<sup>18,19</sup>. These considerations led Darlington to propose  
64 that apomixis is an evolutionary dead end<sup>9</sup>.

65           Nonetheless, apomixis is found in over 400 species belonging to 46 plant families<sup>1</sup>. This  
66    could have two major reasons: First, apomixis is a facultative, quantitative trait<sup>1,20-22</sup>. This means  
67    that in populations of apomictic plants also sexual individuals exist, and that apomictic  
68    individuals have residual sexuality. This enables apomictic species to purge deleterious  
69    mutations from their genomic pool, because apomicts can also, to a certain degree, reproduce  
70    sexually. Second, male sporogenesis and gametogenesis are usually unaffected in apomicts<sup>1,23</sup>.  
71    During male sporogenesis, apomixis loci can segregate, producing pollen that transmit genes  
72    conferring apomixis. Thus, pollen from an apomict can fertilize an apomictic (with residual  
73    sexuality) or a sexual genotype, generating new apomictic and sexual genotypes among the  
74    progeny<sup>1,21,22,24</sup>. As new apomictic genotypes arise from sexual reproduction, apomixis is not  
75    lost as a trait. Together, these two mechanisms provide an explanation for the high genetic  
76    variation found in apomictic populations<sup>15,25-27</sup>. Van Dijk and colleagues<sup>22</sup> described this as the  
77    “apomixis gene’s view”, stating that apomixis persists as a trait in genotypes purged from  
78    deleterious mutations.

79           We chose *Hieracium pilosella* L. (mouse-ear hawkweed), a natural apomict, to study the  
80    ecological dynamics of apomixis during primary succession, i.e., the early stages of colonization  
81    of bare soil after a glacier retreat. *H. pilosella*’s endosperm development is autonomous, i.e.,  
82    independent of fertilization, complying with the assumption of an advantage when possible  
83    mates are rare (conditional advantage), due to reproductive assurance<sup>6-9</sup>. Furthermore, apomictic  
84    and sexual genotypes can have the same ploidy level, which ranges from 3C to 8C [1C = one  
85    haploid genome]<sup>28</sup>. A further asset is that in *Hieracium* subgenus *pilosella* two loci, *LOSS OF*  
86    *APOMEIOSIS (LOA)* and *LOSS OF PARTHENOGENESIS (LOP)*, have been shown to be  
87    required for apomixis<sup>4,29,30</sup>. The model of two independent loci explains the occurrence of four  
88    different offspring types<sup>24</sup>. The four offspring types are distinguished by the number of genome  
89    copies inherited from the mother and from the father, respectively. For example, offspring type  
90    2n + n (B<sub>III</sub> hybrid) means that two copies were inherited from the mother and one from the

Morteratsch\_Sailer et al.

91 father<sup>31,32</sup>. *LOA* and *LOP* control two elements of apomixis, both of which are required to  
92 produce maternal clones ( $2n + 0$ , Fig. 1). If only *LOA* is present, meiosis is omitted but  
93 embryogenesis requires fertilization, leading to an increase in ploidy and paternal genomic  
94 contribution (Fig. 1). The resulting  $2n + n$  offspring is thus generated through a mixture of  
95 apomictic and sexual processes. The same is true if only *LOP* is present, leading to offspring  
96 with reduced ploidy ( $n + 0$ , polyhaploid, Fig. 1), which is the result of meiosis and  
97 parthenogenesis, a sexual and an apomictic process, respectively. If both loci are absent, sexual  
98 reproduction occurs, leading to  $n + n$  offspring (Fig. 1). Because  $2n + n$ ,  $n + 0$ , and  $2n + 0$   
99 offspring types need at least one element of apomixis for their formation, we consider them as  
100 apomictically produced offspring. In short, *H. pilosella* provides a system in which we have a  
101 good understanding of the genetic basis of apomixis and the formation of different cytotypes,  
102 allowing inferences about the processes that led to the formation of a specific individual.

103 To investigate the dynamics of apomixis and sexual reproduction, we sampled *H. pilosella*  
104 along a primary successional gradient on the Morteratsch glacier forefield in the Swiss Alps.  
105 *H. pilosella* occurs throughout the Morteratsch glacier forefield, except at the very earliest stage  
106 (Sailer C, *personal observation*). The Morteratsch forefield has a very well documented chrono-  
107 sequence of the glacial retreat<sup>33,34</sup>. Moreover, because of the flat topography of the forefield, we  
108 do not expect confounding influences of changes in altitude, exposition, or disturbances by  
109 avalanches and landslides on the primary successional gradient. These unique features make the  
110 Morteratsch glacier forefield a particularly well-suited model for a case study on the dynamics  
111 of apomixis along the chrono-sequence of primary succession.

112 We addressed the following questions concerning hypotheses of reproductive assurance of  
113 apomixis in *H. pilosella* in the glacier forefield: (1) What cytotypes of *H. pilosella* occur along  
114 the Morteratsch glacier forefield and do they differ with respect to their reproductive mode? (2)  
115 Does the relative frequency of the four possible offspring types differ between occurring  
116 cytotypes and are these frequencies influenced by the succession? In other words, does the

117 frequency of apomicts and their level of apomixis change along the glacier forefield? (3) How  
118 have different cytotypes with different reproductive modes arisen and do they differ in their  
119 fertility?

## 120 **Results**

### 121 **Apomictic cytotypes are more frequent at early stages of the** 122 **successional gradient**

123 Of the 153 plants, 142 were hexaploids. For 11 plants, we were unable to assign a ploidy  
124 level based on flow cytometry. Six of these had DNA contents between penta- and hexaploids,  
125 and five between tri- and tetraploid. Since we are unable to assign a clear ploidy level, we refer  
126 to those plants as aneuploid for simplicity. Those two cytotypes (hexa- and aneuploid) were not  
127 equally distributed along the successional gradient (2-way interaction,  $F_{1,23} = 4.8$ ,  $P = 0.039$ ).

128 We found 126 plants to be sexual and 27 to be apomictic (18%), disclosing that the  
129 population on the glacier forefield consists of two reproductive types. The abundance of  
130 apomictic individuals does not change along the succession ( $F_{1,4} = 2.05$ ,  $P = 0.226$ , Fig. 2a;  
131 hexaploids only:  $F_{1,4} = 0.057$ ,  $P = 0.823$ , Fig. 2b). *Hieracium pilosella* grows in patches, often  
132 of mixed ploidy, but the majority of patches (35 of 55) we analyzed consisted solely of sexual  
133 individuals. When considering the ecological unit of a patch, we found that the frequency of  
134 apomicts within the patches decreases towards older successional stages ( $F_{1,53} = 3.94$ ,  $P = 0.052$ ,  
135 Fig. 2c). However, this pattern is driven by 11 individuals in 4 patches. If only hexaploid  
136 individuals are considered, we did not find this trend ( $F_{1,52} = 0.069$ ,  $P = 0.794$ , Fig. 2d).

### 137 **The frequency of offspring types involving at least one element of** 138 **apomixis is highest close to the glacier snout**

139 From the total 1231 seeds analyzed, 1166 were  $n + n$  (sexual), 15 were  $2n + n$  (BIII hybrid,  
140 mixed developmental pathways), and 50 were  $2n + 0$  (maternal clones). We did not find a single

Morteratsch\_Sailer et al.

141  $n + 0$  (polyhaploid) offspring (Figure 3), indicating a bias against this specific mixed sexual  
142 (meiosis) and apomictic (parthenogenesis) developmental pathway.

143 The frequency of the three occurring offspring types was mainly determined by the  
144 cytotype, i.e. ploidy of the mother plant (for  $2n + 0$ :  $F_{1,1} = 7.1$ ,  $P = 0.015$ ). In other words,  
145 aneuploid cytotypes had the highest frequency of apomictic offspring. Notably, apomictic  
146 hexaploid plants had a low frequency of apomictic offspring in general (14.4%), and sexual  
147 offspring prevailed in hexaploids (Fig. 4). The amount of residual sexuality varied among  
148 apomictic hexaploid mother plants (Fig. 4), illustrating the facultative nature of apomixis in  
149 *H. pilosella*.

150 Plotting the 27 apomictic plants in relation to the successional stage and the  
151 cytotype/ploidy of their mother plant revealed that the frequency of the three offspring types was  
152 unequally distributed along the succession and depended on the ploidy of the mother plant  
153 (Fig. 5). In particular, sexual ( $n + n$ ) offspring from hexaploid plants were found throughout the  
154 successional gradient with a higher frequency at later stages (Fig. 5a). On the other hand, odd-  
155 ploid cytotypes had a high frequency of  $2n + n$  and  $2n + 0$  offspring. Interestingly, one  
156 pentaploid plant had the highest frequency of  $2n + n$  offspring (Fig. 5b), indicating the necessity  
157 of apomeiosis to produce seeds in odd-ploid plants. Plants with a DNA content between triploid  
158 and tetraploid produced only  $2n + 0$  offspring (maternal clones, Fig. 4). Remarkably, they were  
159 only found close to the glacier snout, at the earliest successional stage at which *H. pilosella*  
160 occurs (Fig. 5c). In other words, the pattern of decreasing abundance of apomictic plants in the  
161 course of succession is driven by the unequal distribution of cytotypes.

## 162 **Genetic exchange occurs frequently between apomicts and sexuals**

163 The overall genetic diversity of *H. pilosella* on the glacier forefield was  $D_\gamma = 14.11$ . The  
164 diversity of the two subpopulations was  $D_{\text{apomicts}} = 11.27$  and  $D_{\text{sexuals}} = 13.72$  (Table 1).  $D_\beta$  was  
165 1.08 (Table 1), indicating that apomictic and sexual plants cross frequently. Furthermore, we did

166 not detect a subpopulation structure in hexaploid plants along the successional gradient  
167 ( $D_{\beta} = 1.51$ , Table 2), except for the apomeiosis-associated marker LOA267 ( $D_{\beta} = 2.49$ , Table 2).

168 Apomictic and sexual plants did not differ in their number of ovules (fecundity;  
169  $F_{1, 151} = 0.09$ ,  $P = 0.765$ , Fig. 6a; hexaploids only:  $F_{1, 137} = 0.08$ ,  $P = 0.772$ , Fig. 6b), but apomictic  
170 plants had a slightly higher fertility than sexuals ( $F_{1, 151} = 3.6$ ,  $P = 0.059$ ), which was independent  
171 of succession (Fig. 6c). However, the difference in fertility is driven by the odd- and aneuploid  
172 cytotypes occurring preferentially at earlier successional stages (hexaploids only:  $F_{1, 137} = 2.59$ ,  
173  $P = 0.110$ , Fig. 6d).

## 174 **Discussion**

### 175 **Different cytotypes are unequally distributed along the succession**

176 We found aneuploid (no clear assignment of ploidy level using flow cytometry), and  
177 hexaploid cytotypes on the Morteratsch glacier forefield, and both cytotypes produced apomictic  
178 offspring ( $2n + n$ ,  $2n + 0$ ). However, the majority of plants were hexaploid and produced solely  
179 sexual offspring ( $n + n$ ). The identification of both sexual and apomictic offspring in the same  
180 hexaploid individuals confirms the facultative nature of apomixis in *H. pilosella*. These results  
181 are in concordance with earlier cyto-geographic studies, which demonstrated the frequent  
182 occurrence of hexaploids in the Swiss Alps and described them as facultatively apomictic<sup>1,35,36</sup>.

183 Even though hexaploid plants prevailed throughout the succession, aneuploid cytotypes  
184 were unequally distributed. Cytotypes with low DNA content only occurred at early stages of  
185 succession, likely because competitive growth is dependent on ploidy, with plants being of lower  
186 ploidy being weak competitors<sup>37</sup>. We see hexaploids as being the more versatile cytotype in  
187 *H. pilosella* as they prevail throughout the succession and, therefore, can grow under a wide  
188 range of competitive biotic conditions.

189 Although only 18% of the plants were found to be apomicts, they were more frequent at  
190 early stages of succession, at which a lower density of potential mating partners is expected. For



Mortersatsch\_Sailer et al.

191 insect pollinated plants such as *H. pilosella*, mating partner density is determined by the area that  
192 is visited by a single insect. Flower visits are less frequent at early than at late stages of  
193 succession<sup>38</sup>, showing that mating partner density is low at early stages. While this pattern is  
194 observed if all cytotypes are analyzed together, it disappears if only hexaploid individuals are  
195 analyzed. In other words, the higher abundance of apomicts at early stages is driven by the higher  
196 abundance of aneuploid cytotypes.

197 Therefore, our finding of a higher frequency of apomicts at early stages of succession does  
198 not comply with Tomlinson's model<sup>6</sup>, which states that selfing is prevailing when mating partner  
199 densities are low, and its interpretation that apomicts have a conditional advantage when mating  
200 partner density is low.

## 201 **The frequency of apomictic offspring is mainly influenced by** 202 **ploidy level**

203 We found a continuous variation of the frequency of apomictic offspring (residual  
204 sexuality) in hexaploid individuals, confirming that apomixis can be viewed as a facultative,  
205 quantitative trait even in predominantly sexual cytotypes. The high frequency of sexual offspring  
206 is in concordance with the sexual developmental pathway being the default in *Hieracium* spp.<sup>4</sup>,  
207 supporting the view of apomixis as an acquired gain-of-function trait.

208 Furthermore, we found that different cytotypes produced different ratios of the four  
209 possible offspring types. Plants with the lowest DNA content (< tetraploid) solely produced  
210  $2n + 0$  offspring and plants with a DNA content between penta- and hexaploid  $2n + n$  offspring,  
211 respectively. The '2n' indicates the apomeiotic origin of these offspring (Fig. 1), which complies  
212 with plants of odd ploidy or aneuploidy being able to produce seeds only if meiosis is  
213 avoided<sup>1,15,23,26,30,39</sup>. The avoidance of meiosis provides an escape from sterility, as Darlington  
214 stated<sup>9</sup>, a view that is supported by our results because the vast majority of offspring were of  
215 apomeiotic origin in these aneuploid plants. They themselves, however, are likely the product of  
216 the  $n + 0$  offspring type.

217 In general, we found low levels of apomixis on the glacier forefield (18%), indicating little  
218 advantage for apomicts during primary succession. The observed low level of apomixis is in  
219 concordance with earlier findings on apomictic species in the nival zone of the Alps<sup>40</sup>. However,  
220 *H. pilosella* plants are capable of reproducing via vegetative stolons. Like apomixis, this enables  
221 clonal reproduction, both for apomictic and sexual genotypes, although offspring number and  
222 dispersal distance are limited. We speculate that the general advantage of apomicts in  
223 *H. pilosella* is confounded by clonal reproduction via aboveground stolons of both sexuals and  
224 apomicts.

225 Another deduction from Tomlinson's model<sup>6</sup> is that apomicts at early stages of succession  
226 should have a high frequency of apomictic offspring. Indeed, we found more apomictic offspring  
227 ( $2n + 0$ ,  $2n + n$ ) near the glacier snout. However, only aneuploid cytotypes had a high frequency  
228 of apomictic offspring, and different cytotypes are not equally distributed along the primary  
229 succession as described above. Our results suggest that the decrease in frequency of apomictic  
230 offspring as succession proceeds is primarily driven by the decrease in the frequency of cytotypes  
231 that produce high levels of apomictic offspring. Together with the high variability of the  
232 frequency of offspring types in hexaploid plants, we conclude that the level of apomixis is mainly  
233 determined by the genetic factors ploidy and reproductive type.

## 234 **Apomixis provides a source of beneficial allele combination in the** 235 **formation of new cytotypes**

236 Figure 1 illustrates that combining sexual and apomictic developmental pathways results  
237 in a change of ploidy and can explain the generation and occurrence of different cytotypes.  
238 However, progeny from such mixed developmental pathways are expected to be rare<sup>24</sup>. Indeed,  
239 we found not a single  $n + 0$  offspring among more than 1200 seeds screened. Moreover, we  
240 would expect a strong selection pressure against decreasing ploidy, as two genome copies are  
241 the minimum for successful meiosis and (partial) hemizygosity can uncover deleterious alleles.  
242 As a consequence, genotypes that mainly produce  $n + 0$  offspring will be selected against, which

Morteratsch\_Sailer et al.

243 is likely the reason why we did not find a single  $n + 0$  offspring in the field. Such negative  
244 selection is not expected for  $2n + n$  offspring, which results in a ploidy increase.

245 Despite the rarity of  $n + 0$  offspring, we found two patches of plants with a DNA content  
246 that was close to triploidy. These can only arise from  $n + 0$  offspring, as most of the plants in the  
247 Morteratsch population are hexaploid. We consider each of these two patches to be a rare  
248 developmental and demographic event, as the  $n + 0$  offspring bearing seed had to germinate and  
249 survive until maturity and reproduction. Taken together, we interpret this observation as support  
250 for Baker's law, which states that a single individual which is capable of self-reproduction, is  
251 sufficient to found a new population<sup>7</sup>.

252 The high frequency of sexual offspring ( $n + n$ ) in hexaploid apomicts throughout the  
253 succession hints towards frequent genetic exchange. Based on genetic diversity data, we found  
254 that apomicts and sexuals behaved like a single population ( $D_{\beta}$  close to 1), suggesting random  
255 mating between individuals with different modes of reproduction. This enables the generation  
256 of new apomictic and sexual cytotypes and supports the 'apomixis gene's view'<sup>22</sup> while  
257 contradicting Darlington's 'dead end of evolution' hypothesis<sup>9</sup>, at least for as long as facultative  
258 sexuality exists in this species.

259 Apomixis fixes genotypes and if an apomictic genotype is successful in the sense of growth  
260 and reproduction, beneficial allele combinations are frozen. These allele combinations are  
261 provided in every generation to the population's genomic pool via gene flow between apomicts  
262 and sexuals. In contrast to sexual reproduction, the beneficial allele combinations of successful  
263 apomictic genotypes, which can cover large parts of the genome, are not broken down by  
264 recombination. We propose that apomixis preserves successful genotypes, which can repeatedly  
265 serve as a source of beneficial combinations of unlinked alleles in every generation for as long  
266 as the genotype persists in the population.

267 We estimated genetic diversity along the succession by assuming six subpopulations  
268 corresponding to the six time windows sampled. As we found no strong differentiation among

269 the subpopulations from different time windows on the glacier forefield, based on neutral SSR  
270 markers ( $D_{\beta}$  close to 1), we conclude that the genetic exchange (gene flow) along the  
271 successional gradient is high. In contrast, the presumably non-neutral LOA267 marker, which is  
272 associated with apomeiosis, showed low diversity at early stages of succession and the  $D_{\beta}$  value  
273 suggests 2-3 subpopulations. Taken together, this suggests a cline along the successional  
274 gradient, pointing towards less genetic diversity near the apomeiosis locus at early stages of  
275 succession, in which apomicts are more frequent. The lower diversity at this non-neutral marker  
276 is a signature of selection for apomeiosis at these early stages, further supporting a selective  
277 advantage of apomixis at early stages of succession. Because recombination around the locus  
278 controlling apomeiosis is suppressed in most apomicts, LOA267 likely reflects the segregation  
279 of a larger genomic region. However, given the current genotyping methods for *H. pilosella* and  
280 the yet unidentified genes conferring apomixis, interpretations based on the LOA267 marker  
281 alone remain speculative.

## 282 **Conclusions**

283 We found a higher frequency of apomictic *H. pilosella* at early stages of primary  
284 succession on the Morteratsch glacier forefield. This higher frequency is due to the higher  
285 abundance of aneuploid cytotypes that do have the highest level of apomixis in this meta-  
286 population. Apomixis does provide an escape from sterility and reproductive assurance for such  
287 cytotypes, which themselves are likely to be the product of an apomictic developmental pathway.  
288 We conclude that the primary conditional advantage for apomicts is not necessarily the low  
289 density of potential mates but rather the escape from sterility for odd- and aneuploid cytotypes.

## 290 **Materials and Methods**

### 291 **Model species and sampling**

292 *Hieracium pilosella* L. is a self-incompatible, perennial, monocarpic, stoloniferous,  
293 herbaceous species. *H. pilosella* usually grows in patches of individual plants (rosettes). When

Morteratsch\_Sailer et al.

294 rosettes reach a threshold size, they reproduce vegetatively via aboveground stolons and through  
295 seeds by producing a single flower head on a stem<sup>41</sup>. *H. pilosella* occurs in ploidy levels from  
296 3C to 8C, with 5C cytotypes found at the margins of its geographical occurrence and 6C  
297 cytotypes being found throughout Europe, predominantly in the Alps [84% in Switzerland]<sup>42</sup>.  
298 Although *H. pilosella* is an obligate outcrosser, self-pollen germinates if non-self-pollen is also  
299 present on the stigma [mentor effect]<sup>35</sup>.

300 In preparation for sampling, the whole Morteratsch glacier forefield of ca. 1.5 km<sup>2</sup> was  
301 searched for occurrence of *H. pilosella* and the positions of 912 patches were marked with GPS  
302 (GPSmap 60CS, Garmin, Garching, Germany) to an accuracy of 5 m. The positions were  
303 transferred to the topographical Swiss map (Topo Schweiz V1, Garmin, Garching, Germany)  
304 using the MapSource software (Garmin, Garching, Germany). The map with the marked  
305 positions was printed and the data of the chrono-sequence of deglaciation, dating back to 1857  
306 when the Morteratsch glacier had its maximal extent<sup>43</sup>, was constructed based on a published  
307 map<sup>34</sup>. The glacier forefield was then sub-divided into six twenty-year time windows (51, 71,  
308 91, 111, 131, and 154 years after deglaciation). Patches of *H. pilosella* lying on the isochronal  
309 lines, i.e., lines connecting the glacial front at certain years, as published by Burga and  
310 colleagues<sup>34</sup> were dismissed. Per time window, ten patches of *H. pilosella* on each side of the  
311 river were randomly selected for sampling. From each of these patches, we aimed at collecting  
312 six reproducing plants. Sometimes, we could not find six flowering plants per patch and sampled  
313 all occurring reproducing plants in the patch instead. Furthermore, some seed samples were lost.  
314 For analysis, we only used plants from which we could sample DNA from leaves and seeds.  
315 Leaves for DNA analysis and seeds from flower heads could be collected from 234 mother  
316 plants, coming from 74 patches. In July 2011, the two youngest leaves of each individual were  
317 sampled for ploidy determination and DNA extraction. One leaf was shock-frozen in a vapor-  
318 shipper (SC 4/2 V, MVE Biomedical, Georgia, USA). The tip of the second leaf was placed in a  
319 1.2 mL cluster tube (Thermo Scientific, Wohlen, Switzerland) containing 50  $\mu$ L of mQ water

320 (conductivity  $> 18 \text{ M}\Omega^{-1}$ ) and one 3 mm stainless steel bead (Schieritz & Hauenstein AG,  
321 Zwingen, Switzerland), and stored in a cooling bag. Closed capitula from the same plants were  
322 bagged using individually marked tea filters for seed collection. In August 2011, the individually  
323 marked tea filters containing the seeds were collected and placed in plastic containers containing  
324 silica gel to ensure fast drying of the seed material. Seeds were stored at  $4^{\circ}\text{C}$ , 30% humidity until  
325 used.

## 326 **DNA extraction and genetic diversity estimation**

327 DNA was extracted from the sampled leaves of mother plants using the DNeasy Plant Mini  
328 kit (Qiagen, Hombrechtikon, Switzerland), following the manufacturer's instructions. Samples  
329 were eluted in  $2 \times 50 \mu\text{L}$  AE buffer.

330 We used markers for *LOA* and *LOP*<sub>29,44</sub>, as well as SSR markers for *H. pilosella*<sub>45</sub>, to  
331 estimate overall genetic diversity of the entire meta-population on the glacier forefield. All  
332 primer pairs were tested and optimized for our samples. SSR markers were resolved on the high-  
333 resolution cartridge of the Qiaxcel system (Qiagen, Hombrechtikon, Switzerland). Three SSR  
334 markers and one *LOA* marker were highly polymorphic and could be used for genetic diversity  
335 estimation using Shannon's entropy<sub>46</sub>. We calculated  $H_{\gamma}$  as the overall genetic diversity of the  
336 Morteratsch population. We considered apomicts and sexuals or the samples from the six  
337 different time windows as subpopulations. Using apomicts and sexuals as subpopulations, we  
338 could test for gene flow between the individuals of different modes of reproduction. Using the  
339 individuals from the six time windows as subpopulations, we could test for changes of genetic  
340 diversity along the primary succession.  $H_{\alpha}$  was computed as the mean diversity of the  
341 subpopulations.  $H_{\beta}$  was computed as  $H_{\gamma}$  minus  $H_{\alpha}$ .  $H_{\beta}$  is interpreted as the number of  
342 subpopulations present in the population, based on genetic diversity. Thus, if apomicts and  
343 sexuals are genetically isolated populations, we expect  $H_{\beta} = 2$ , while if they are genetically a  
344 single population, we expect  $H_{\beta} = 146$ . If there are genetic subpopulations along the primary  
345 succession, we expect  $H_{\beta} \geq 2$  for the six different time windows (maximum  $H_{\beta} = 6$ ). We present

Morteratsch\_Sailer et al.

346 diversity (D) instead of entropy (H), which is the exponent of the entropy ( $D = eH$ ), and  
347 corresponds to the number of markers found.

## 348 **Ploidy analysis of mother plants and flow cytometric seed screen**

349 The ploidy level of the sampled mother plants was determined by ploidy analysis using  
350 flow cytometry within 48 h after collection of the leaf samples, following the two-step method  
351 described by Dolezel and colleagues<sup>47</sup> with minor modifications. A small piece of a *Bellis*  
352 *perennis* (1.72 pg DNA per nucleus) leaf was added as internal standard to the collected leaf  
353 material, which was in 50  $\mu$ L water. 50  $\mu$ L of 0.2 M citric acid (Fluka, Buchs, Switzerland),  
354 0.01% Triton X-100 (Sigma-Aldrich, Steinheim, Germany) was added to a total volume of  
355 100  $\mu$ L, and the leaf material was disrupted by shaking it 2 times for 30 sec at 30 Hz using a  
356 mixer-mill (MM300, Retsch, Haan, Germany). After bead-beating 100  $\mu$ L of 0.1 M citric acid  
357 (Fluka, Buchs, Switzerland), 1% Triton X-100 (Sigma-Aldrich, Steinheim, Germany) were  
358 added and mixed by inverting the plates to achieve a concentration of 0.1 M citric acid and ca.  
359 0.5% Triton-X-100 in a total volume of 200  $\mu$ L. The solution was filtered through fritted deep  
360 well plates (Nunc, Thermo Scientific, Wohlen, Switzerland) into 96-well V-bottom plates  
361 (Sarstedt, Numbrecht, Germany). Nuclei were collected by centrifugation at 150g for 5 min at  
362 20°C (Centrifuge 5810R, Eppendorf, Schönebuch, Switzerland). The supernatant was removed  
363 and nuclei were resuspended in 40  $\mu$ L 0.1 M citric acid, 0.5% Triton X-100. 160  $\mu$ L of staining  
364 solution [0.4 M  $\text{Na}_2\text{HPO}_4$  (Merck, Darmstadt, Germany), 5.5  $\mu\text{g}/\text{mL}$  4',6-diamidino-2-  
365 phenylindole (DAPI; Invitrogen, Eugene, Oregon), and 0.2  $\mu\text{L}/\text{mL}$  2-mercaptoethanol (Sigma-  
366 Aldrich, Steinheim, Germany)] were added 2 min prior to analysis by flow cytometer robotics  
367 (Quanta SC MPL, Beckman-Coulter, Nyon, Switzerland). The run was stopped at a count of  
368 6000 in the defined sample region or latest after 3:40 min runtime. As the haploid (1C) DNA  
369 content of *B. perennis* and *H. pilosella* is the same<sup>48</sup>, the ploidy of samples could be calculated  
370 by dividing the median of the *H. pilosella* peak by the median of the *B. perennis* peak and  
371 multiplied by 2, to account for diploidy of the *B. perennis* internal standard. We considered



372 individuals with a  $C_x \geq 5.8$  as hexaploid. The protocol and analysis were set up and optimized  
373 with tetraploid *H. pilosella* plants which's ploidy was confirmed by chromosome counts  
374 (courtesy of Jan Suda, Department of Botany, Charles University and Institute of Botany,  
375 Academy of Sciences, Czech Republic).

376 The flow cytometric seed screen<sup>49</sup> followed essentially the same procedure<sup>50</sup>. Single seeds  
377 were put into 1.2 mL cluster tubes (Thermo Scientific, Wohlen, Switzerland) containing one  
378 3 mm stainless steel bead (Schieritz & Hauenstein AG, Zwingen, Switzerland). 80  $\mu$ L of 0.1 M  
379 citric acid (Fluka, Buchs, Switzerland), 0.1% Triton X-100 (Sigma-Aldrich, Steinheim,  
380 Germany) were added. Seeds were disrupted by shaking them 2 times for 3 min at 30 Hz in a  
381 mixer mill. The internal *B. perennis* standard was produced separately from the seeds and used  
382 to resuspend the nuclei of the samples. We screened up to 12 seeds per mother plant. This enabled  
383 us to detect as low as 8% apomixis per plant. Plants scored as sexual have therefore operationally  
384 less than 8% apomixis. In total, we screened 1830 seeds coming from 197 individuals.

## 385 **Developmental origin of the seeds**

386 The ratios of the ploidies of (1) endosperm to embryo and (2) embryo to mother plant were  
387 used for a linear discriminant analysis (LDA) to assign the developmental origin of the seeds to  
388 the four offspring types ( $n + n$ ,  $2n + n$ ,  $n + 0$ ,  $2n + 0$ , Fig. 1). As training set we used manually  
389 annotated data from a different experiment (Sailer et al., *unpublished data*). Datasets were  
390 considered to be of sufficient quality if the half peak coefficient of variance HPCV  $< 5\%$  for the  
391 ploidy of the mother, and HPCV  $< 7\%$  for the ploidy of the embryo. Only datasets of sufficient  
392 quality were included in the analysis. We used a higher HPCV value as cutoff in the seed screen  
393 because the histograms from seeds from the field are noisier than the histograms from leaves.  
394 Furthermore, we excluded all individuals from which we had results of sufficient quality from  
395 only one seed. The final dataset contained data from 1231 seeds derived from 153 individual  
396 mother plants. As not a single  $n + 0$  type offspring was identified, some  $2n + 0$  offspring were



Morteratsch\_Sailer et al.

397 mis-assigned. Therefore, the  $n + 0$  were removed from the training set and the LDA repeated  
398 (Supplementary Fig. 1). The LDA had a wrong assignment rate of 3.4% (Supplementary Fig. 1).

## 399 **Statistical analyses**

400 First, we tested the effects of succession, position in the patch (extrinsic factors), and  
401 ploidy of the mother plant (intrinsic factor) on the frequency of apomicts, the frequency of the  
402 four offspring types, fecundity (number of ovules), and fertility (number of mature seeds/number  
403 of ovules) of the mother plant. Second, in a separate analysis, we tested the effect of succession  
404 on the ploidy of the mother plant. For all response variables, except ploidy of the mother plant,  
405 we used the F-test in ANOVA on generalized linear models (glm), which were first fitted in the  
406 order of intrinsic factors, followed by environmental (extrinsic) factors. For testing the effects  
407 of succession and patch-position on the ploidy of the mother plant, we used a linear model. By  
408 backward elimination of non-significant terms, with keeping variables if they were part of  
409 significant interactions, we arrived at the final model. We used the family function  
410 “quasibinomial” for over- and underdispersed data with the canonical link function “logit”.  
411 Furthermore, the model was weighted by the total number of analyzed individual plants or seeds.  
412 In case of interactions, we conservatively tested the corresponding term against the interaction  
413 term, instead of against the residual term. All statistical analyses were carried out in R<sup>51</sup>. Graphs  
414 were produced using the ggplot2 package<sup>52</sup> and the grid package<sup>51</sup>.

415

## 416 **Acknowledgements**

417 We thank Nuno Pires and Roger Schmid (University of Zurich) for help with fieldwork  
418 and Christian Mavris (University of Zurich) for supplying isochrone data for map construction.  
419 We further thank Alain Held and Seraina Camenisch for sorting and counting seeds. We are  
420 grateful to Joana Bernardes de Assis, Anja Herrmann, Sofia Magarida Nobre, Philipp Schlüter,  
421 and Anja Schmidt (University of Zurich), as well as Andrew Lloyd and Levi Yant (Harvard

422 University) for comments on the manuscript. This work was supported by the University of  
423 Zurich and a PSC-Syngenta Fellowship Project of the Zurich-Basel Plant Science Center to J.S.  
424 and U.G.

425

## 426 **Author Contributions**

427 U.G. and J.S. conceived and supervised the project, C.S., J.S., and U.G. designed  
428 experiments and methodology, C.S. collected and analyzed the data, U.G., J.S., and C.S. wrote  
429 the manuscript.

430

## 431 **Competing Interests**

432 The authors declare no competing interests.

433

## 434 **Data availability**

435 Data generated or analysed during this study are included in the Supplementary  
436 Information files.

437

438

439 **Figures**

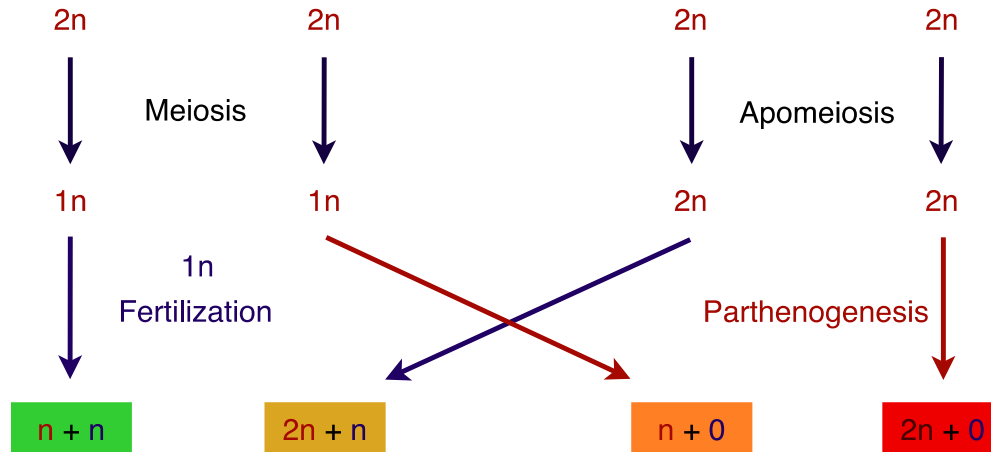

440

441 **Fig 1. The four developmental pathways in apomictic *Hieracium* spp.** The sexual  
442 developmental pathway with meiosis and fertilization generates  $n + n$  offspring (left, green). The  
443 apomictic pathway consisting of apomeiosis and parthenogenesis creates maternal clonal  $2n + 0$   
444 offspring (right, red). The two loci conferring apomeiosis and parthenogenesis can segregate,  
445 resulting in mixed pathways (middle). The sexual process of meiosis combined with the  
446 apomictic process of parthenogenesis generates polyhaploid  $n + 0$  offspring (orange). This  
447 offspring type is a new cytotype with half the maternal genomic content. The apomictic process  
448 of apomeiosis combined with the sexual process of fertilization produces BIII hybrid  $2n + n$   
449 offspring (golden). This offspring type is a new cytotype with increased genomic content,  
450 compared to the parents. Red and dark blue depict maternal and paternal contributions to the  
451 offspring, respectively.

452

453

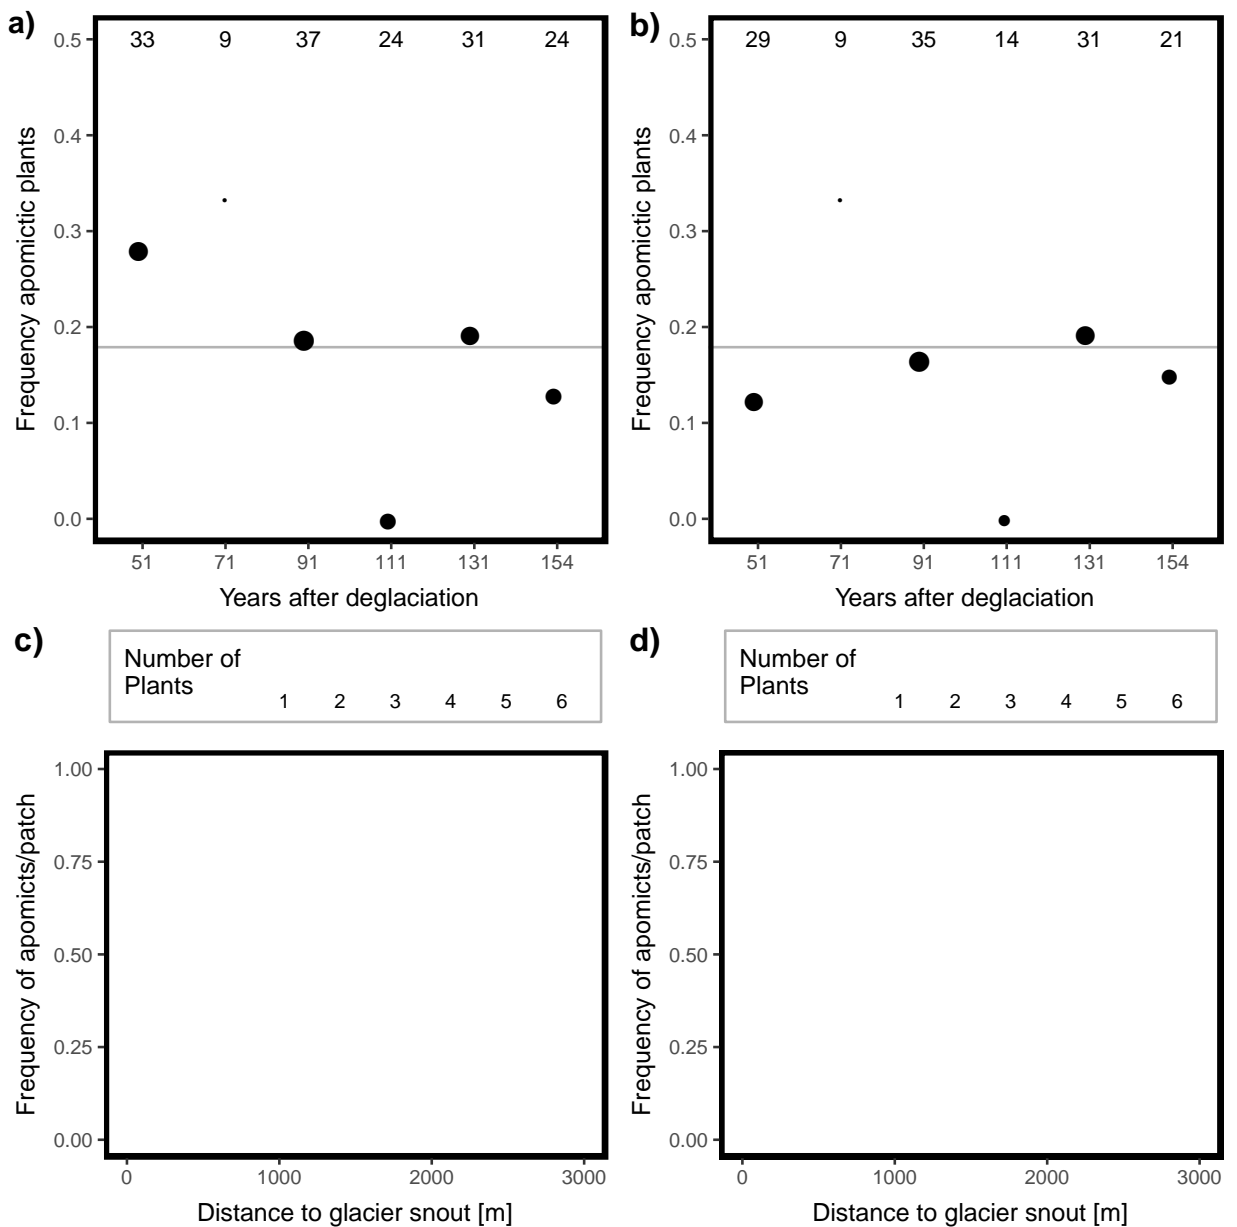

454

455 **Fig 2. Frequency of apomicts. a-b)** Frequency of **a)** all and **b)** hexaploid apomictic  
 456 individuals in the six time windows sampled along the primary successional gradient. The  
 457 frequency of apomictic plants does not differ along the successional gradient (a):  $F_{1,5} = 2.05$ ,  
 458  $P = 0.226$ ; b):  $F_{1,5} = 0.063$ ,  $P = 0.814$ ). The size of the dots corresponds to the number of  
 459 individuals sampled. The grey horizontal line indicates the average frequency of apomicts on the  
 460 forefield of the Morteratsch glacier. **c-d)** Frequency of **c)** all and **d)** hexaploid apomicts per patch  
 461 along the primary successional gradient. There is a slight trend towards a lower frequency of

Morteratsch\_Sailer et al.

462 apomicts at later stages of the succession (c):  $F_{1, 53} = 3.94$ ,  $P = 0.053$ ), which disappears if solely  
463 hexaploid individuals are considered (d):  $F_{1, 52} = 0.069$ ,  $P = 0.794$ ). 35 patches consisted entirely  
464 of sexual plants, 16 patches had apomictic and sexual individuals, and 4 patches consisted  
465 exclusively of apomictic plants. The size of the dots corresponds to the number of plants sampled  
466 per patch.  
467

468

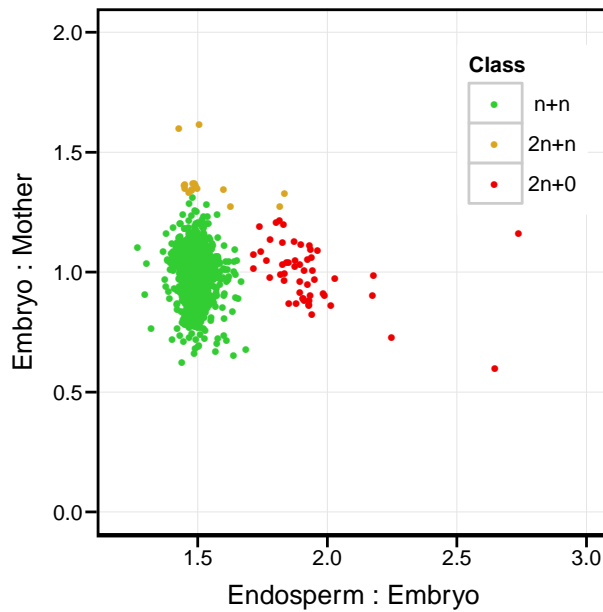

469

470 **Fig 3. Developmental origin of seeds.** Most of the 1231 seeds analyzed, coming from 153  
471 individuals, result from the sexual pathway ( $n + n$ , green). Maternal clonal offspring, generated  
472 by the apomictic pathway ( $2n + 0$ , red), are common. Seeds produced via the mixed pathway of  
473 apomeiosis and fertilization ( $2n + n$ , golden) were rare. The fourth pathway, meiosis and  
474 parthenogenesis ( $n + 0$ ), does not contribute to the seed pool we sampled. Developmental origin  
475 is determined by the ploidy ratio of embryo to mother and the ploidy ratio of endosperm to  
476 embryo. The wrong assignment rate of the linear discriminant analysis is 3.4%.

477

478

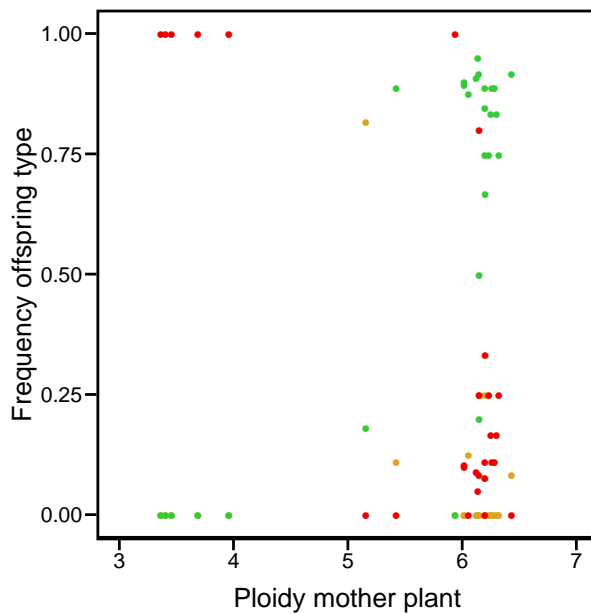

479

480 **Fig 4. Frequency of offspring types in relation to ploidy of the apomictic mother plant.**

481 Hexaploid apomicts have a high frequency of sexual  $n + n$  offspring (green) and a low frequency  
482 of maternal clonal  $2n + 0$  offspring (red). Plants with an aneuploid DNA content are fully  
483 apomictic. The least frequent offspring type,  $2n + n$  (golden), has a high frequency particularly  
484 in pentaploid plants.

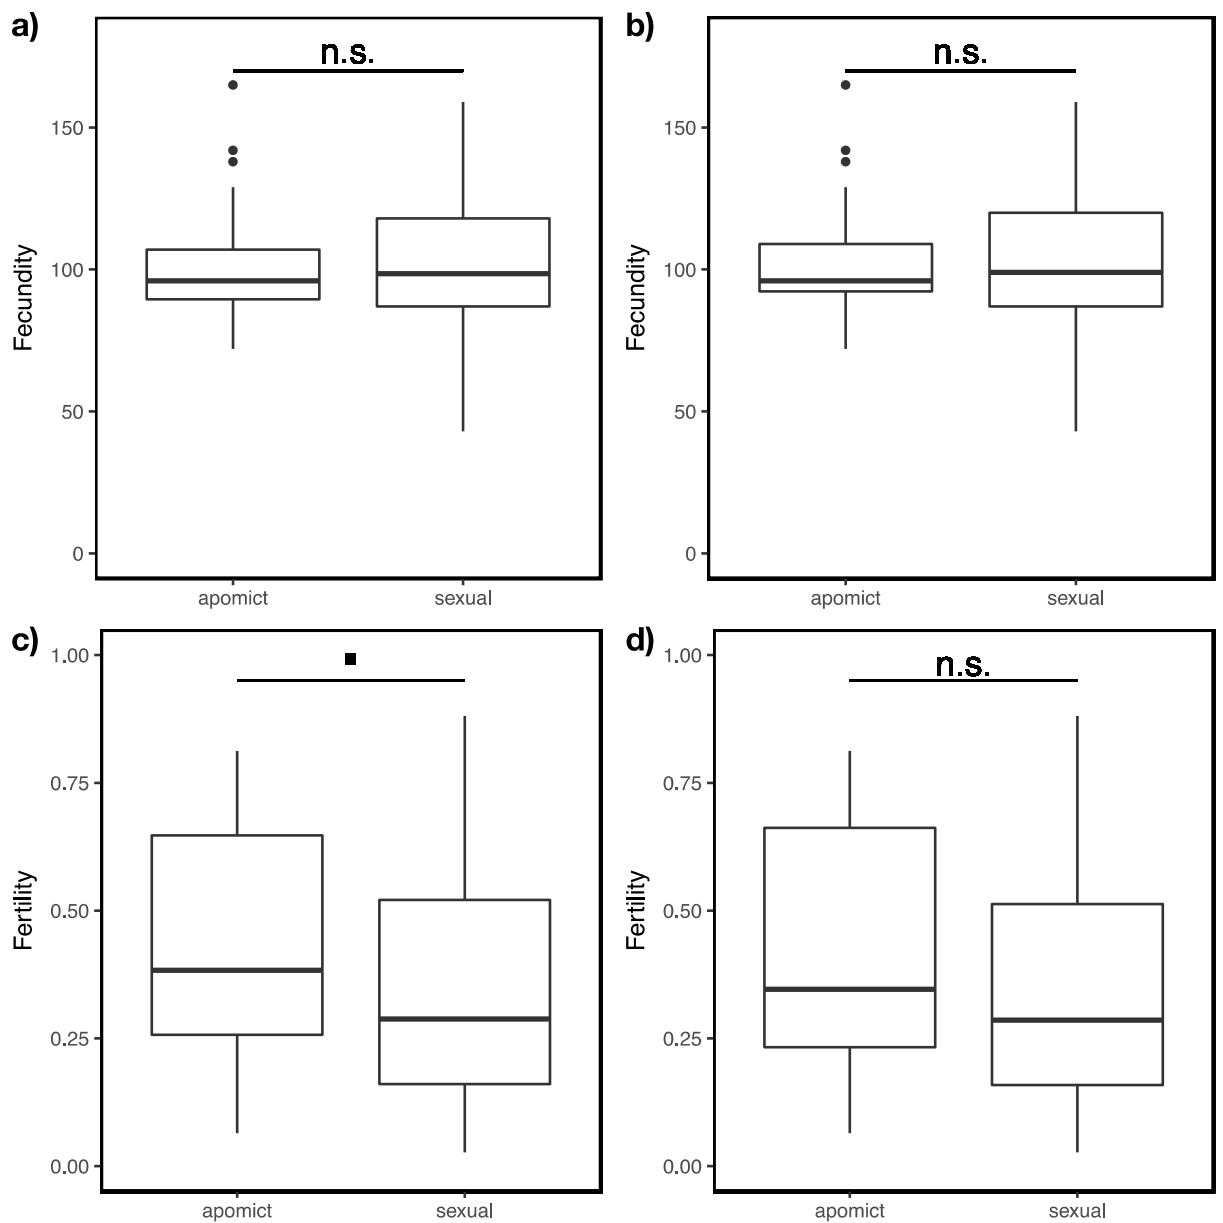

485

486 **Fig 5. Frequency of offspring types in apomicts along the primary successional**

487 **gradient. a)** Hexaploid apomicts show a high frequency of sexual  $n + n$  offspring throughout

488 the succession with only a few exceptions. **b)** One pentaploid apomict has a high frequency of

489 the  $B_{III}$  hybrid  $2n + n$  offspring. **c)** Aneuploid apomicts, which solely occur at the early stages of

490 succession ( $F_{1,151} = 12.9$ ,  $P < 0.001$ ), have the highest frequency of maternal clonal  $2n + 0$

491 offspring. For hexaploid plants, the frequency of  $2n + 0$  offspring declines along the successional

492 gradient.

493



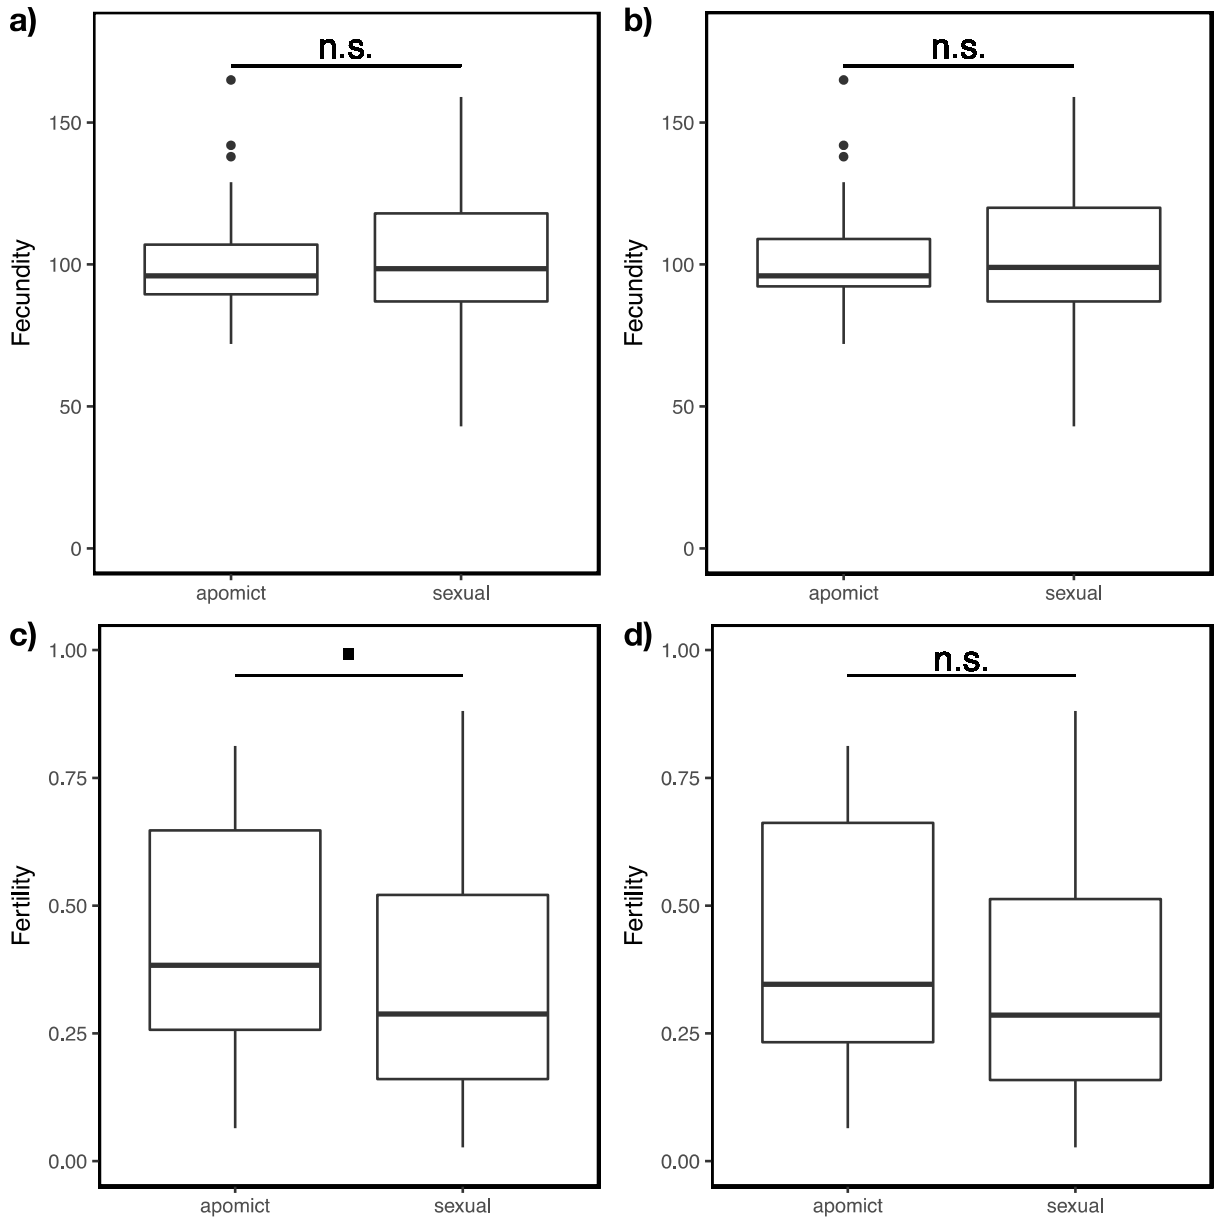

494

495 **Fig 6. Fertility and fecundity of apomictic and sexual plants. a-b)** Fecundity (number

496 of ovules) of apomictic and sexual plants does not differ (a):  $F_{1, 151} = 0.09, P = 0.765$ ; hexaploids

497 only b):  $F_{1, 137} = 0.08, P = 0.772$ , b)). **c-d)** Fertility of apomictic and sexual plants. **c)** Apomicts

498 have a marginally higher fertility (number of mature seeds/number of ovules) than sexuals,

499 irrespective of the successional stage ( $F_{1, 151} = 3.6, P = 0.059$ ). **d)** Fertility of apomictic and

500 sexual hexaploid plants does not differ ( $F_{1, 137} = 2.59, P = 0.110$ ).

501

502 **Tables**

503

504 **Table 1. Genetic diversity of apomictic and sexual *H. pilosella* on the forefield of the**

505 **Morterasch glacier, based on several molecular markers.**

| <b>Marker</b>  | <b>D<sub>β</sub></b> | <b>D<sub>γ</sub></b> | <b>D<sub>α</sub></b> | <b>D<sub>apomict</sub></b> | <b>D<sub>sexual</sub></b> |
|----------------|----------------------|----------------------|----------------------|----------------------------|---------------------------|
| <b>LOA267</b>  | 1.24                 | 10.63                | 8.55                 | 7.25                       | 10.07                     |
| <b>SSR3</b>    | 1.02                 | 14.08                | 13.85                | 13.86                      | 13.84                     |
| <b>SSR42</b>   | 0.99                 | 11.47                | 11.55                | 11.98                      | 11.13                     |
| <b>SSR87</b>   | 1.07                 | 20.27                | 19.02                | 11.98                      | 19.83                     |
| <b>Average</b> | <b>1.08</b>          | <b>14.11</b>         | <b>13.24</b>         | <b>11.27</b>               | <b>13.72</b>              |

506 D<sub>β</sub> corresponds to the number of subpopulations, which can be distinguished genetically. D<sub>γ</sub> is

507 the genetic diversity of all *H. pilosella* plants analyzed. D<sub>α</sub> is the mean diversity of the two

508 subpopulations of apomictic and sexual cytotypes. D<sub>apomict</sub> and D<sub>sexual</sub> are the genetic diversities

509 of apomictic and sexual plants, respectively.

510

Morteratsch\_Sailer et al.

511  
512 **Table 2. Genetic diversity of hexaploid *H. pilosella* on the forefield of the Morteratsch**  
513 **glacier.**

| Marker         | $D_{\beta}$ | $D_{\gamma}$ | $D_{\alpha}$ | $D_{51}$    | $D_{71}$    | $D_{91}$     | $D_{111}$    | $D_{131}$    | $D_{154}$    |
|----------------|-------------|--------------|--------------|-------------|-------------|--------------|--------------|--------------|--------------|
| LOA267         | 2.49        | 10.51        | 4.22         | 2.83        | 2.00        | 6.14         | 3.78         | 8.16         | 5.24         |
| SSR3           | 1.12        | 14.16        | 12.66        | 13.02       | 12.48       | 15.43        | 12.16        | 11.24        | 12.01        |
| SSR42          | 1.17        | 11.32        | 9.68         | 9.55        | 7.22        | 12.16        | 10.05        | 11.37        | 8.60         |
| SSR87          | 1.26        | 20.40        | 16.14        | 13.19       | 13.57       | 17.94        | 17.54        | 18.09        | 17.38        |
| <b>Average</b> | <b>1.51</b> | <b>14.09</b> | <b>10.68</b> | <b>9.65</b> | <b>8.82</b> | <b>12.92</b> | <b>10.88</b> | <b>12.21</b> | <b>10.81</b> |

514  $D_{\beta}$  corresponds to the number of subpopulations, which can be distinguished genetically.  $D_{\gamma}$  is  
515 the genetic diversity of all *H. pilosella* plants analyzed.  $D_{\alpha}$  is the mean diversity of the six  
516 assumed subpopulations. The diversity of subpopulations corresponding to different time  
517 windows since deglaciation is also given ( $D_{51}$ ,  $D_{71}$ ,  $D_{91}$ ,  $D_{111}$ ,  $D_{131}$ , and  $D_{154}$ ). The index  
518 refers to the age of the sampled time window (see methods).  
519

## 520 References

- 521 1 Asker, S. J., Lenn. *Apomixis in plants*. 1st edn, (CRC Press, 1992).
- 522 2 Grossniklaus, U. M., JM; Gagliano WB. Molecular and genetic approaches to  
523 understanding and engineering apomixis: *Arabidopsis* as a powerful tool in *Advances in*  
524 *Hybrid Rice Technology* (ed SS; Siddiq Virmani, EA; Muralidharan, K) Ch. 16, 187-  
525 211 (International Rice Research Institute, 1998).
- 526 3 Tucker, M. R. *et al.* Sexual and apomictic reproduction in *Hieracium* subgenus  
527 *Pilosella* are closely interrelated developmental pathways. *Plant Cell* **15**, 1524-1537,  
528 doi:10.1105/tpc.011742 (2003).
- 529 4 Koltunow, A. M. G. *et al.* Sexual reproduction is the default mode in apomictic  
530 *Hieracium* subgenus *Pilosella*, in which two dominant loci function to enable apomixis.  
531 *Plant. J.* **66**, 890-902 (2011).
- 532 5 Grossniklaus, U., Nogler, G. A. & van Dijk, P. J. How to avoid sex: the genetic control  
533 of gametophytic apomixis. *Plant Cell* **13**, 1491-1497, doi:10.2307/3871381 (2001).
- 534 6 Tomlinson, J. The advantages of hermaphroditism and parthenogenesis. *J. Theor. Biol.*  
535 **11**, 54-58 (1966).
- 536 7 Baker, H. G. Self-compatibility and establishment after 'long-distance' dispersal.  
537 *Evolution* **9**, 347-349 (1955).
- 538 8 Stebbins, G. L. Self fertilization and population variability in the higher plants. *Am.*  
539 *Nat.* **91**, 337-354 (1957).
- 540 9 Darlington, C. D. Apomixis: The escape in *Evolution of genetic systems* Ch. 20, 157-  
541 168 (Olivier and Boyd LTD., 1958).
- 542 10 Lynch, M. Destabilizing hybridization, general-purpose genotypes and geographic  
543 parthenogenesis. *Q. Rev. Biol.* **59**, 257-290 (1984).
- 544 11 Hörandl, E. The complex causality of geographical parthenogenesis. *New. Phytol.* **171**,  
545 525-538, doi:10.1111/j.1469-8137.2006.01769.x (2006).
- 546 12 Vrijenhoek, R. C. & Parker, E. D. Geographical parthenogenesis: general purpose  
547 genotypes and frozen niche variation in *Lost Sex: The Evolutionary Biology of*  
548 *Parthenogenesis* (eds Isa Schön, Koen Martens, & Peter Dijk) Ch. 6, 99-131 (Springer  
549 Netherlands, 2009).
- 550 13 Cosendai, A.-C. & Hörandl, E. Cytotype stability, facultative apomixis and  
551 geographical parthenogenesis in *Ranunculus kuepferi* (Ranunculaceae). *Ann. Bot.* **105**,  
552 457-470 (2010).
- 553 14 Hörandl, E. & Tensch, E. M. Introgression of apomixis into sexual species is inhibited  
554 by mentor effects and ploidy barriers in the *Ranunculus auricomus* complex. *Ann. Bot.*  
555 **104**, 81-89 (2009).
- 556 15 Chapman, H. M., Parh, D. & Oraguzie, N. Genetic structure and colonizing success of a  
557 clonal, weedy species, *Pilosella officinarum* (Asteraceae). *Heredity* **84**, 401-409,  
558 doi:10.1046/j.1365-2540.2000.00657.x (2000).
- 559 16 Morgan-Richards, M., Trewick, S. A., Chapman, H. M. & Krahulcova, A. Interspecific  
560 hybridization among *Hieracium* species in New Zealand: evidence from flow  
561 cytometry. *Heredity* **93**, 34-42, doi:10.1038/sj.hdy.6800476 (2004).
- 562 17 Krahulec, F. & Krahulcova, A. Ploidy levels and reproductive behaviour in invasive  
563 *Hieracium pilosella* in Patagonia. *NeoBiota* **11**, 25-31, doi:10.3897/neobiota.11.1349  
564 (2011).
- 565 18 Muller, H. J. Some genetic aspects of sex. *Am. Nat.* **66**, 118-138 (1932).
- 566 19 Muller, H. J. The relation of recombination to mutational advance. *Mutation*  
567 *Research/Fundamental and Molecular Mechanisms of Mutagenesis* **1**, 2-9 (1964).
- 568 20 *Apomixis: evolution, mechanisms and perspectives*. 1st edn, (Gantner, A R, 2007).

- 569 21 Sailer, C., Schmid, B. & Grossniklaus, U. Apomixis allows the transgenerational  
570 fixation of phenotypes in hybrid plants. *Curr. Biol.* **26**, 331-337,  
571 doi:<https://doi.org/10.1016/j.cub.2015.12.045> (2016).
- 572 22 Van Dijk, P., de Jong, H., Vijverberg, K. & Biere, A. in *Lost Sex: The Evolutionary*  
573 *Biology of Parthenogenesis* (eds Isa Schön, Koen Martens, & Peter Dijk) 475-493  
574 (Springer Netherlands, 2009).
- 575 23 Koltunow, A. M. & Grossniklaus, U. Apomixis: a developmental perspective. *Annu.*  
576 *Rev. Plant Biol.* **54**, 547-574 (2003).
- 577 24 Bicknell, R. A., Lambie, S. C. & Butler, R. C. Quantification of progeny classes in two  
578 facultatively apomictic accessions of *Hieracium*. *Hereditas* **138**, 11-20 (2003).
- 579 25 van der Hulst, R. G. M. *et al.* Genetic structure of a population sample of apomictic  
580 dandelions. *Heredity* **90**, 326-335, doi:10.1038/sj.hdy.6800248 (2003).
- 581 26 Houlston, G. J. & Chapman, H. M. Reproductive strategy and population variability in  
582 the facultative apomict *Hieracium pilosella* (Asteraceae). *Am. J. Bot.* **91**, 37-44, (2004).
- 583 27 Verhoeven, K. J. F. & Preite, V. Epigenetic variation in asexually reproducing  
584 organisms. *Evolution* **68**, 644-655 (2014).
- 585 28 Greilhuber, J., DoležEL, J., LysÁK, M. A. & Bennett, M. D. The origin, evolution and  
586 proposed stabilization of the terms ‘genome size’ and ‘C-value’ to describe nuclear  
587 DNA contents. *Ann. Bot.* **95**, 255-260 (2005).
- 588 29 Catanach, A. S., Erasmuson, S. K., Podivinsky, E., Jordan, B. R. & Bicknell, R.  
589 Deletion mapping of genetic regions associated with apomixis in *Hieracium*. *P. Natl.*  
590 *Acad. Sci.* **103**, 18650, doi:10.1073/pnas.0605588103 (2006).
- 591 30 Okada, T., Catanach, A. S., Johnson, S. D., Bicknell, R. A. & Koltunow, A. M. An  
592 *Hieracium* mutant, loss of apomeiosis 1 (*loa1*) is defective in the initiation of apomixis.  
593 *Sex. Plant Reprod.* **20**, 199-211, doi:10.1007/s00497-007-0057-5 (2007).
- 594 31 Rutishauser, A. in *Pseudogamie und Polymorphie in der Gattung Potentilla* 267-424  
595 (University of Illinois in Urbana-Champaign, 1948).
- 596 32 Harlan, J. R. & deWet, J. M. J. On Ö. Winge and a Prayer: The origins of polyploidy.  
597 *Bot. Rev.* **41**, 361-390 (1975).
- 598 33 Burga, C. A. Vegetation development on the glacier forefield Morteratsch  
599 (Switzerland). *Appl. Veg. Sci.* **2**, 17-24 (1999).
- 600 34 Burga, C. A. *et al.* Plant succession and soil development on the foreland of the  
601 Morteratsch glacier (Pontresina, Switzerland): Straight forward or chaotic? *Flora* **205**,  
602 561-576 (2010).
- 603 35 Mráz, P. Mentor effects in the genus *Hieracium* s.str. (Compositae, Lactuceae). *Folia*  
604 *Geobot.* **38**, 345-350 (2003).
- 605 36 Gadella, T. W. J. Cytology and the mode of reproduction of some taxa of *Hieracium*  
606 subgenus *Pilosella*. *P. K. Ned. Akad. C Biol.* **87**, 387-399 (1984).
- 607 37 Sailer, C., Schmid, B., Stöcklin, J. & Grossniklaus, U. Sexual *Hieracium pilosella*  
608 plants are better inter-specific, while apomictic plants are better intra-specific  
609 competitors. *Perspect. Plant Ecol.* **16**, 43-51 (2014).
- 610 38 Albrecht, M., Riesen, M. & Schmid, B. Plant–pollinator network assembly along the  
611 chronosequence of a glacier foreland. *Oikos* **119**, 1610-1624, doi:10.1111/j.1600-  
612 0706.2010.18376.x (2010).
- 613 39 Bicknell, R. A. & Koltunow, A. M. Understanding apomixis: recent advances and  
614 remaining conundrums. *Plant Cell* **16**, S228 (2004).
- 615 40 Hörandl, E. *et al.* Apomixis is not prevalent in subnival to nival plants of the European  
616 Alps. *Ann. Bot.* **108**, 381-390 (2011).

- 617 41 Winkler, E. & Stöcklin, J. Sexual and vegetative reproduction of *Hieracium pilosella* L.  
618 under competition and disturbance: a grid-based simulation model. *Ann. Bot.* **89**, 525-  
619 536 (2002).
- 620 42 Mráz, P., Šingliarová, B., Urfus, T. & Krahulec, F. Cytogeography of *Pilosella*  
621 *officinarum* (Compositae): altitudinal and longitudinal differences in ploidy level  
622 distribution in the Czech Republic and Slovakia and the general pattern in Europe. *Ann.*  
623 *Bot.* **101**, 59-71 (2007).
- 624 43 Cryospheric Commission (EKK) of the Swiss Academy of Sciences (SCNAT). The  
625 Swiss glaciers. Report No. 1-5, (2012).
- 626 44 Okada, T. *et al.* Chromosomes carrying meiotic avoidance loci in three apomictic  
627 eudicot *Hieracium* subgenus *Pilosella*; species share structural features with two  
628 monocot apomicts. *Plant Physiol.* **157**, 1327, doi:10.1104/pp.111.181164 (2011).
- 629 45 Zini, E. & Komjanc, M. Identification of microsatellite markers in *Hieracium pilosella*  
630 L. *Conserv. Genet.* **9**, 487-489 (2008).
- 631 46 Jost, L. Entropy and diversity. *Oikos* **113**, 363-375, doi:10.1111/j.2006.0030-  
632 1299.14714.x (2006).
- 633 47 Doležel, J., Greilhuber, J. & Suda, J. Estimation of nuclear DNA content in plants using  
634 flow cytometry. *Nat. Prot.* **2**, 2233-2244, doi:10.1038/nprot.2007.310 (2007).
- 635 48 Suda, J. *et al.* Genome size variation and species relationships in *Hieracium* Sub-genus  
636 *Pilosella* (Asteraceae) as inferred by flow cytometry. *Ann. Bot.* **100**, 1323-1335 (2007).
- 637 49 Matzk, F., Meister, A. & Schubert, I. An efficient screen for reproductive pathways  
638 using mature seeds of monocots and dicots. *Plant. J.* **21**, 97-108 (2000).
- 639 50 Sailer, C., Schmidt, A. & Grossniklaus, U. Determination of the developmental origin  
640 of seeds containing endosperm using flow cytometric analysis. *Bio-protocol* **5**, e1484,  
641 doi:10.21769/BioProtoc.1484 (2015).
- 642 51 R: a language and environment for statistical computing (R Foundation for Statistical  
643 Computing, Vienna, Austria, 2016).
- 644 52 Wickham, H. *ggplot2: elegant graphics for data analysis*. 1st edn, (Springer-Verlag  
645 New York, 2009).
- 646
